# Supplementary material
Source: publisher site journal article supplement (https://www.dovepress.com/get_supplementary_file.php?f=161379-Table-S3.xlsx)
Supplement: Supplementary file 1 [file get_supplementary_file.php]

## Sheet: Sheet1
Supplemental Table 3. Signficantly altered viral species (p-value <= 0.05)
TaxonID	Species	Taxonomy Family	Bacteriophage	Controls Counts	AgNP Counts	AgOAC Counts	Log2Fold (AgNP/Control)	Pvalue AgNP/Control	Log2Fold (AgOAC/Control)	Pvalue AgOAC/Control
1204516	Aeromonas phage CC2	Myoviridae	yes	29.1383	93.7839	32.187	1.69	0.010032	0.14	0.38553
1204533	Bacillus phage phiAGATE	Myoviridae	yes	10.1984	4.89307	0.919628	-1.06	0.588649	-3.47	0.00443474
1357713	Bacillus phage phiCM3	Siphoviridae	yes	11.6553	0.815512	2.75888	-3.84	0.000224	-2.08	0.156858
10286	Betaentomopoxvirus			10.1984	1.63102	2.75888	-2.64	0.0197638	-1.89	0.222356
28883	Caudovirales			16018.8	50157.3	42476.7	1.65	0.0114256	1.41	0.0297005
756282	Cellulophaga phage phiST	Siphoviridae	yes	21.8538	28.5429	87.3646	0.39	0.270491	2	0.00542033
536474	Cyanophage Syn30	Ascoviridae		14.5692	7.33961	1.83926	-0.99	0.644446	-2.99	0.018686
28289	Cydia pomonella granulovirus	Baculoviridae		381.712	45.6687	39.544	-3.06	0.00500632	-3.27	0.00829693
101570	Enterobacteria phage ES18	Siphoviridae	yes	14.5692	57.9014	45.9814	1.99	0.00356148	1.66	0.0150485
1147145	Enterobacteria phage HK446	Siphoviridae	yes	243.305	695.632	609.713	1.52	0.017213	1.33	0.0364587
432200	Enterobacteria phage HK542	Siphoviridae	yes	61.1905	203.063	130.587	1.73	0.00879196	1.09	0.0650502
1147148	Enterobacteria phage HK629	Siphoviridae	yes	198.141	527.636	393.601	1.41	0.0239765	0.99	0.081499
37554	Enterobacteria phage HK97	Siphoviridae	yes	189.399	533.345	469.01	1.49	0.0188675	1.31	0.0383398
10710	Enterobacteria phage lambda	Siphoviridae	yes	47628.1	171161	140394	1.85	0.00585149	1.56	0.0198935
1147150	Enterobacteria phage mEp235	Siphoviridae	yes	109.269	291.138	228.068	1.41	0.0239765	1.06	0.0696692
1147151	Enterobacteria phage mEp237	Siphoviridae	yes	10.1984	30.9895	22.0711	1.6	0.0134074	1.11	0.0621135
1147152	Enterobacteria phage mEp460	Siphoviridae	yes	145.692	353.117	317.271	1.28	0.0348388	1.12	0.0606867
1147153	Enterobacteria phage mEpX1	Siphoviridae	yes	39.3368	106.832	85.5254	1.44	0.0219349	1.12	0.0606867
10679	Enterobacteria phage P2	Myoviridae	yes	11.6553	9.78615	0.919628	-0.25	0.706273	-3.66	0.00235878
10760	Enterobacteria phage T7	Podoviridae	yes	855.21	39280.8	1373.92	5.52	4.72e-12	0.68	0.154681
1147156	Enterobacterial phage mEp213	Siphoviridae	yes	21.8538	112.541	91.9627	2.36	0.000857	2.07	0.00433179
663241	Enterococcus phage phiEf11	Siphoviridae	yes	81.5873	16.3102	46.901	-2.32	0.0490371	-0.8	0.921041
1161939	Enterococcus phage vB_Efae230P-4	Podoviridae	yes	16.0261	22.0188	46.901	0.46	0.237509	1.55	0.0204458
542960	Epsilon15likevirus			10.1984	6.5241	0.919628	-0.64	0.948197	-3.47	0.00443474
906668	Escherichia phage HK75	Siphoviridae	yes	304.496	957.412	732.024	1.65	0.0114256	1.27	0.0423505
632112	Lactobacillus phage Lb338-1	Myoviridae	yes	53.9059	126.404	199.559	1.23	0.0400162	1.89	0.0076353
578234	Lactobacillus phage Lv-1	Siphoviridae	yes	71.3889	243.023	337.503	1.77	0.00769069	2.24	0.00246347
12417	Lactobacillus phage phiadh	Siphoviridae	yes	27.6814	87.2598	192.202	1.66	0.011062	2.8	0.000314
354260	Lactococcus phage P335 sensu lato	Siphoviridae	yes	85.9581	104.386	216.112	0.28	0.328415	1.33	0.0364587
186765	Lambdalikevirus			212660	760635	625387	1.84	0.00605736	1.56	0.0198935
1074213	Mouse kobuvirus M-5/USA/2010	Picornaviridae		40.7937	25.2809	4.59814	-0.69	0.903203	-3.15	0.0118591
1340830	Mycobacterium phage KayaCho	Siphoviridae	yes	11.6553	0.815512	0.919628	-3.84	0.000224	-3.66	0.00235878
1623299	Phifllikevirus			10.1984	16.3102	32.187	0.68	0.15258	1.66	0.0150485
1328032	Porcine stool-associated circular virus 3	Microviridae	yes	2779.8	549.655	2838.89	-2.34	0.0464889	0.03	0.450485
10271	Rabbit fibroma virus	Poxviridae		46.6213	56.2704	216.112	0.27	0.334053	2.21	0.00272709
1535247	Saimiriine herpesvirus 4	Herpesviridae		11.6553	4.07756	1.83926	-1.52	0.288264	-2.66	0.0441882
1127357	Salmonella phage SPN9CC	Podoviridae	yes	50.9921	120.696	83.6861	1.24	0.0389315	0.71	0.145933
10699	Siphoviridae			30442.3	107120	89749.2	1.82	0.00648878	1.56	0.0198935
10855	Spiroplasma phage 4	Microviridae	yes	11.6553	0.815512	6.43739	-3.84	0.000224	-0.86	0.872221
320844	Staphylococcus phage 71	Siphoviridae	yes	10.1984	1.63102	8.27665	-2.64	0.0197638	-0.3	0.678016
1434319	Staphylococcus phage vB_SepS_SEP9	Siphoviridae	yes	273.9	58.7169	41.3832	-2.22	0.0635994	-2.73	0.0371326
306323	Streptococcus phage 2972	Siphoviridae	yes	715.346	201.432	85.5254	-1.83	0.157614	-3.06	0.0153617
459845	Streptococcus phage 858	Siphoviridae	yes	23.3107	24.4654	67.1328	0.07	0.459665	1.53	0.0215907
85154	Streptococcus phage O1205	Siphoviridae	yes	205.425	424.882	920.547	1.05	0.0643631	2.16	0.00322428
1267169	Streptococcus phage phiBHN167	Hytrosaviridae		11.6553	1.63102	2.75888	-2.84	0.0105462	-2.08	0.156858
382359	Synechococcus phage syn9	Myoviridae	yes	193.77	39.9601	20.2318	-2.28	0.054486	-3.26	0.00855217
110456	T7likevirus			58.2767	840.793	42.3029	3.85	5.12e-07	-0.46	0.802125
1443910	Turkey stool associated circular ssDNA virus	Microviridae	yes	30.5953	4.89307	42.3029	-2.64	0.0197638	0.47	0.22736
1133560	unclassified I3-like viruses			17.483	4.89307	1.83926	-1.84	0.154311	-3.25	0.00881441
335795	unclassified Lambda-like viruses			1440.89	5302.46	4273.51	1.88	0.00527118	1.57	0.0193542
329157	unclassified T7-like viruses			119.467	78.2892	12.8748	-0.61	0.975283	-3.21	0.00993665
51677	Xestia c-nigrum granulovirus	Baculoviridae		157.347	63.61	22.9907	-1.31	0.409926	-2.77	0.0335494
